# Supplementary material for: A SnO2/MXene hybrid nanocomposite as a negative electrode material for asymmetric supercapacitors
Source: Royal Society of Chemistry journal article supplement (doi:10.1039/d3se00969f), 2023-01-01
Supplement: d3se00969f1.pdf [file d3se00969f1.pdf]

### Electronic Supporting Information

#### **SnO<sub>2</sub>/MXene hybrid nanocomposite as negative electrode material for asymmetric supercapacitor**

***Abhisek Padhy<sup>a,b</sup>, Seetha Lakshmy<sup>c</sup>, Brahmananda Chakraborty<sup>d,e\*</sup> and J. N. Behera<sup>a,b\*</sup>***

*<sup>a</sup>National Institute of Science Education and Research (NISER), An OCC of Homi Bhabha National Institute, Jatni, Khordha 752050, Odisha, India. E-mail: [jnbehera@niser.ac.in](mailto:jnbehera@niser.ac.in)*

*<sup>b</sup>Centre for Interdisciplinary Sciences (CIS), NISER, Jatni 752050, Odisha, India*

*<sup>c</sup>International and Inter University Centre for Nanoscience and Nanotechnology, Mahatma Gandhi University, Kottayam, Kerala 686 560, India*

*<sup>d</sup>High Pressure & Synchrotron Radiation Physics Division, Bhabha Atomic Research Centre, Trombay, Mumbai-400085, India. Email: [brahma@barc.gov.in](mailto:brahma@barc.gov.in)*

*<sup>e</sup>Homi Bhabha National Institute, Mumbai-400094, India*

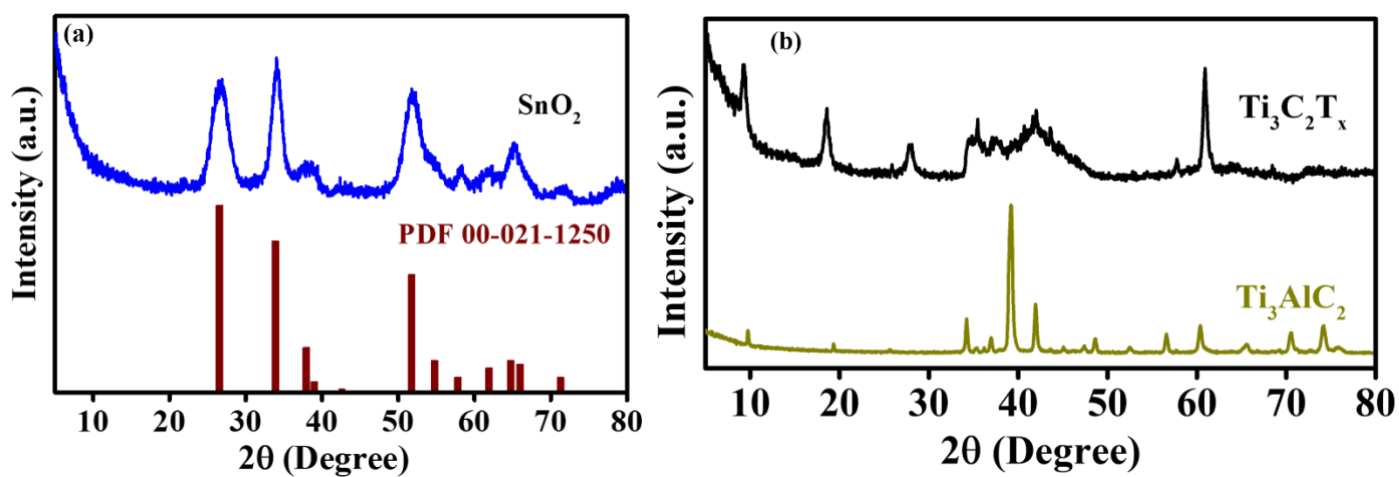

Fig. S1 (a) PXRD pattern of bare SnO<sub>2</sub> matching with PDF card No. PDF 00-021-1250, (b) PXRD pattern of Ti<sub>3</sub>AlC<sub>2</sub> and Ti<sub>3</sub>C<sub>2</sub>T<sub>x</sub> suggesting the successful etching of aluminium from Ti<sub>3</sub>AlC<sub>2</sub>.

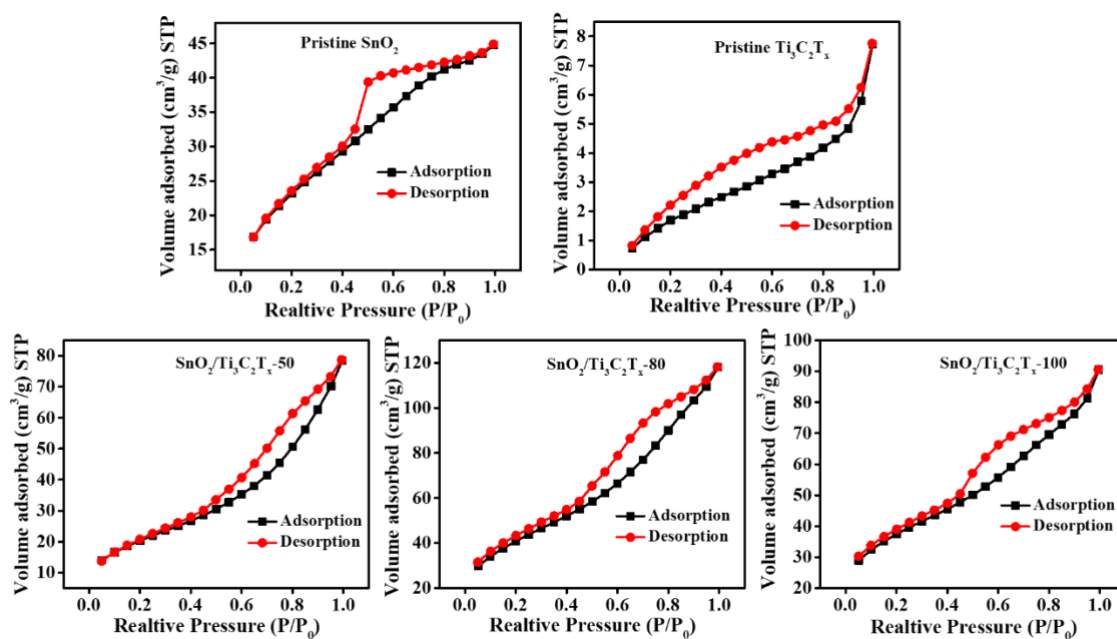

Fig. S2 Adsorption and desorption isotherm for pristine SnO<sub>2</sub>, pristine Ti<sub>3</sub>C<sub>2</sub>T<sub>x</sub>, SnO<sub>2</sub>/Ti<sub>3</sub>C<sub>2</sub>T<sub>x</sub>-50, SnO<sub>2</sub>/Ti<sub>3</sub>C<sub>2</sub>T<sub>x</sub>-80, SnO<sub>2</sub>/Ti<sub>3</sub>C<sub>2</sub>T<sub>x</sub>-100

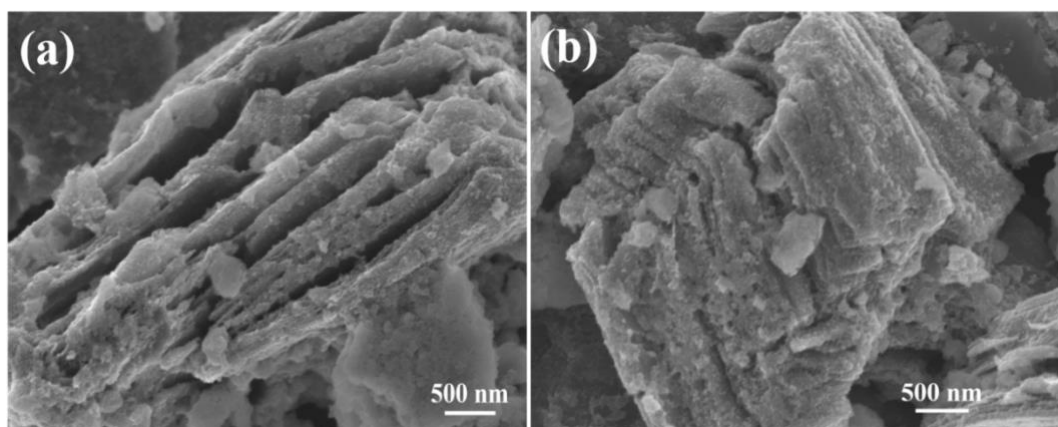

Fig. S3 (a) & (b) SEM image of SnO<sub>2</sub>/Ti<sub>3</sub>C<sub>2</sub>T<sub>x</sub>-50 and SnO<sub>2</sub>/Ti<sub>3</sub>C<sub>2</sub>T<sub>x</sub>-100 respectively.

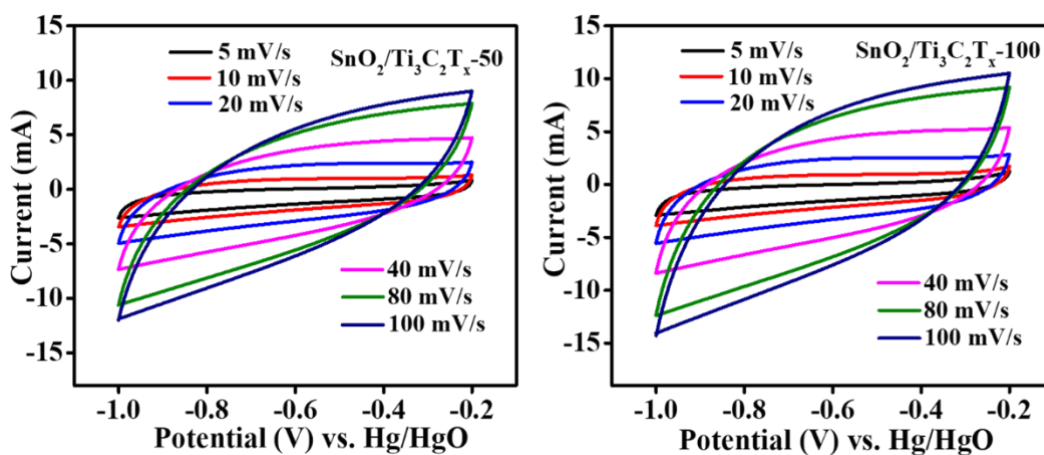

Fig. S4 CV curves of SnO<sub>2</sub>/Ti<sub>3</sub>C<sub>2</sub>T<sub>x</sub>-50 and SnO<sub>2</sub>/Ti<sub>3</sub>C<sub>2</sub>T<sub>x</sub>-100

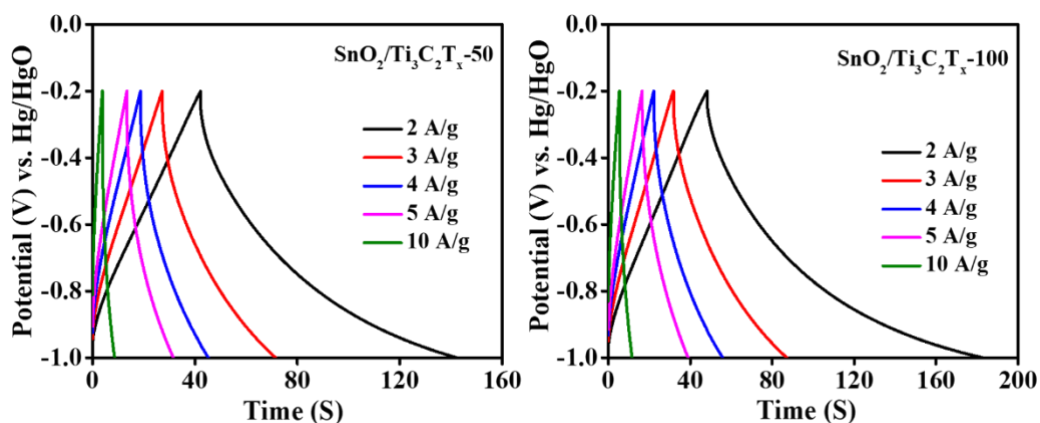

Fig. S5 CV curves of SnO<sub>2</sub>/Ti<sub>3</sub>C<sub>2</sub>T<sub>x</sub>-50 and SnO<sub>2</sub>/Ti<sub>3</sub>C<sub>2</sub>T<sub>x</sub>-100

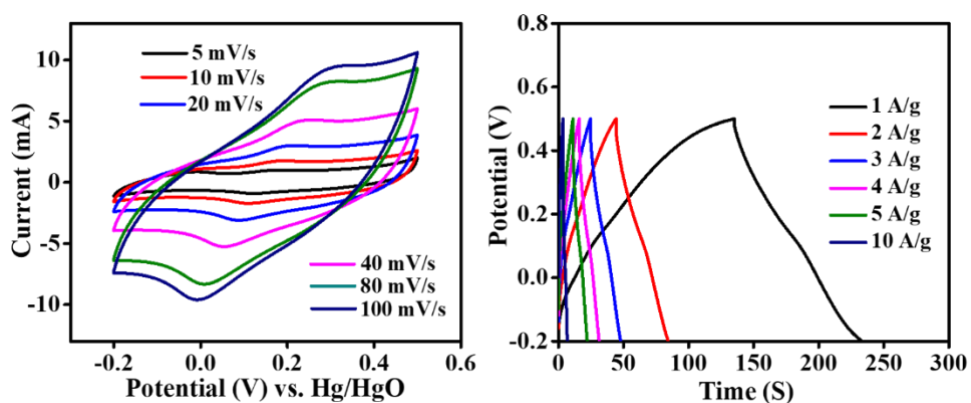

Fig. S6 CV curves of cobalt phosphate

**Table S1**

| Name of the Material                                                 | BET surface area (m <sup>2</sup> /g) |
|----------------------------------------------------------------------|--------------------------------------|
| Pristine SnO <sub>2</sub>                                            | 66.82                                |
| Pristine Ti <sub>3</sub> C <sub>2</sub> T <sub>x</sub>               | 8.76                                 |
| SnO <sub>2</sub> /Ti <sub>3</sub> C <sub>2</sub> T <sub>x</sub> -50  | 91.57                                |
| SnO <sub>2</sub> /Ti <sub>3</sub> C <sub>2</sub> T <sub>x</sub> -80  | 151.3                                |
| SnO <sub>2</sub> /Ti <sub>3</sub> C <sub>2</sub> T <sub>x</sub> -100 | 122.2                                |

**Table S2**

| Name                                                               | Current Density/S can Rate | Electrolyte                         | Specific capacitance (F/g) | Specific Capacitance of the device (F/g) | Cyclic Stability of the device | References                                               |
|--------------------------------------------------------------------|----------------------------|-------------------------------------|----------------------------|------------------------------------------|--------------------------------|----------------------------------------------------------|
| SnO <sub>2</sub> @GNSs                                             | 0.2 A/g                    | 1 M H <sub>2</sub> SO <sub>4</sub>  | 126                        | -                                        |                                | <i>J. Alloys Compd.</i> , 2016, <b>674</b> , 44–50       |
| SnO <sub>2</sub> /GNSs composite                                   | 20 mV/s                    | 30 wt% KOH                          | 195                        | -                                        |                                | <i>J. Mater. Chem.</i> , 2011, <b>21</b> , 16197         |
| APCNFs/SnO <sub>2</sub>                                            | 1 A/g                      | 3 M KOH                             | 225.4                      | 43.3 F/g                                 | 2500 cycles                    | <i>Electrochim. Acta</i> , 2019, <b>308</b> , 121–130    |
| RGO/SnO <sub>2</sub> nanocomposite                                 | 4.5 A/g                    | 1 M H <sub>2</sub> SO <sub>4</sub>  | 396                        | -                                        |                                | <i>New J. Chem.</i> , 2015, <b>39</b> , 8505–8512        |
| SnO <sub>2</sub> /rGO composites                                   | 50 mA/g                    | 1 M H <sub>2</sub> SO <sub>4</sub>  | 348                        | -                                        | -                              | <i>J. Phys. Chem. C</i> , 2014, <b>118</b> , 15146–15153 |
| SnO <sub>2</sub> /SWCNTs core-shell nanowires                      | 6 mV/s                     | 1 M Na <sub>2</sub> SO <sub>4</sub> | 320                        | -                                        | -                              | <i>Powder Technol.</i> , 2012, <b>224</b> , 306–310      |
| SnO <sub>2</sub> @C composite                                      | 1 A/g                      | 1 M KOH                             | 432                        | -                                        | -                              | <i>Electrochim. Acta</i> , 2021, <b>365</b> , 137284     |
| <b>SnO<sub>2</sub>/Ti<sub>3</sub>C<sub>2</sub>T<sub>x</sub>-80</b> | <b>2 A/g</b>               | <b>3 M KOH</b>                      | <b>620</b>                 | <b>107 F/g</b>                           | <b>15,000 cycles</b>           | <b>This Work</b>                                         |

**Table S3**

| <b>Name</b>                                                        | <b>BET surface area (m<sup>2</sup> g<sup>-1</sup>)</b> | <b>Specific capacitance (F g<sup>-1</sup>)</b> | <b>Reference</b>                             |
|--------------------------------------------------------------------|--------------------------------------------------------|------------------------------------------------|----------------------------------------------|
| 300-K-Ag-Ti <sub>3</sub> CNT <sub>x</sub>                          | 82.63                                                  | 451                                            | J. Mater. Chem. A, 2022, 10, 18812–18821     |
| VS <sub>2</sub> -MX-50                                             | 7.33                                                   | 106.3                                          | ACS Appl. Energy Mater. 2021, 4, 14198–14209 |
| 400-KOH- Ti <sub>3</sub> C <sub>2</sub>                            | 22.6                                                   | 517                                            | Adv. Energy Mater. 2017, 1602725             |
| BCN/MoS <sub>2</sub> -11                                           | 22.8                                                   | 283                                            | Journal of Power Sources 402 (2018) 163–173  |
| 3D-BCN-950                                                         | 649                                                    | 380                                            | J. Mater. Chem. A, 2018, 6, 21225–21230      |
| BN-HGA-2                                                           | 249                                                    | 456                                            | Carbon 159 (2020): 94-101                    |
| BNDC                                                               | 1022.4                                                 | 504                                            | Journal of Power Sources 400 (2018) 264–276  |
| Nanoporous BCN                                                     | 506.9                                                  | 475                                            | Materials Letters 246 (2019) 28–31           |
| <b>SnO<sub>2</sub>/Ti<sub>3</sub>C<sub>2</sub>T<sub>x</sub>-80</b> | <b>151.3</b>                                           | <b>620</b>                                     | <b>This work</b>                             |
